# Supplementary material
Source: HighWire-hosted journal article supplement (https://ard.bmj.com/content/78/1/100)
Supplement: inline-supplementary-material-2 [file inline-supplementary-material-2.docx]

Table S1. Clinical and demographic characteristics of the study population.

| Patient ID | Age (years) | Gender | Weight  (Kg) | TKA | HSS score | CRP  (mg/dL) | ESR  (mm/h) | WBC  (109/L) | Lymphocyte  (109/L) | Monocyte (109/L) |
| --- | --- | --- | --- | --- | --- | --- | --- | --- | --- | --- |
| OA1 | 60 | Male | 66.5 | Left | 56 | 0.1 | 3 | 7.40 | 0.33 | 0.064 |
| OA2 | 66 | Male | 80 | Right | 67 | 0.2 | 3 | 5.60 | 0.45 | 0.082 |
| OA3 | 65 | Male | 62.5 | Right | 59 | 0.1 | 2 | 6.70 | 0.26 | 0.054 |
| OA4 | 64 | Female | 62 | Left | 56 | 0.1 | 17 | 5.13 | 0.46 | 0.058 |
| OA5 | 74 | Female | 58 | Left | 79 | 0.3 | 12 | 3.80 | 0.27 | 0.084 |
| OA6 | 71 | Female | 71 | Right | 50 | 0.1 | 16 | 6.65 | 0.32 | 0.060 |
| OA7 | 61 | Female | 57 | Right | 58 | 0.2 | 12 | 5.40 | 0.30 | 0.059 |
| OA8 | 77 | Female | 64 | Right | 62 | 0.5 | 12 | 5.22 | 0.42 | 0.069 |
| OA9 | 67 | Female | 77 | Left | 54 | 0.5 | 9 | 5.11 | 0.51 | 0.376 |
| OA10 | 60 | Female | 71 | Left | 61 | 0.1 | 7 | 6.61 | 0.46 | 0.056 |

| Patient ID | Blood glucose (mmol/L) | ALT (U/L) | AST (U/L) | Total Protein (g/L) | Serum albumin (g/L) | BUN (mmol/L) | Cre (μmoI/L) | TT (s) | APTT (s) | INR |
| --- | --- | --- | --- | --- | --- | --- | --- | --- | --- | --- |
| OA1 | 4.39 | 25.1 | 20.2 | 66.1 | 43.3 | 5.51 | 88.4 | 17.5 | 40.1 | 1.06 |
| OA2 | 4.02 | 11.2 | 15.6 | 64.7 | 39.2 | 6.39 | 91.0 | 17.0 | 49.1 | 1.02 |
| OA3 | 4.85 | 9.6 | 11.8 | 66.6 | 38.3 | 4.92 | 64.5 | 15.8 | 40.2 | 0.96 |
| OA4 | 5.79 | 13.5 | 13.2 | 65.4 | 39.9 | 5.91 | 58.9 | 16.5 | 37.7 | 1.03 |
| OA5 | 4.69 | 7.2 | 15.8 | 67.5 | 40.9 | 7.3 | 76.4 | 15.8 | 36.7 | 1.10 |
| OA6 | 5.23 | 25.8 | 18.2 | 72.0 | 41.3 | 7.68 | 54.1 | 15.9 | 45.5 | 1.04 |
| OA7 | 5.19 | 25.9 | 29.0 | 70.4 | 41.3 | 6.14 | 55.4 | 16.4 | 33.7 | 0.93 |
| OA8 | 5.69 | 11.6 | 14.3 | 70.1 | 41.1 | 7.14 | 61.4 | 16.9 | 35.6 | 0.93 |
| OA9 | 6.31 | 22.0 | 17.4 | 78.7 | 46.5 | 6.07 | 69.1 | 15.9 | 39.4 | 1.04 |
| OA10 | 5.17 | 15.8 | 16.9 | 52.5 | 40.0 | 3.88 | 57.8 | 16.0 | 34.1 | 1.04 |
