# Supplementary material
Source: HighWire-hosted journal article supplement (https://ard.bmj.com/content/78/1/100)
Supplement: inline-supplementary-material-3 [file inline-supplementary-material-3.docx]

Table S2. Cell number before and after quality control. The row indicates the number of cells from each stage and the column indicates the number of cell from each patient.

(Before quality control)

|  | OA1 | OA2 | OA3 | OA4 | OA5 | OA6 | OA7 | OA8 | OA9 | OA10 | SUM |
| --- | --- | --- | --- | --- | --- | --- | --- | --- | --- | --- | --- |
| S0 | 32 | 32 | 32 | 32 | 32 | 32 | 32 | 32 | 32 | 32 | 320 |
| S1 | 32 | 32 | 32 | 32 | 32 | 32 | 32 | 32 | 32 | 32 | 320 |
| S2 | 32 | 32 | 32 | 32 | 32 | 32 | 32 | 32 | 32 | 32 | 320 |
| S3 | 32 | 32 | 32 | 32 | 32 | 32 | 32 | 32 | 32 | 32 | 320 |
| S4 | 32 | 32 | 32 | 32 | 32 | 32 | 32 | 32 | 32 | 32 | 320 |
| SUM | 160 | 160 | 160 | 160 | 160 | 160 | 160 | 160 | 160 | 160 | 1600 |

(After quality control)

|  | OA1 | OA2 | OA3 | OA4 | OA5 | OA6 | OA7 | OA8 | OA9 | OA10 | SUM |
| --- | --- | --- | --- | --- | --- | --- | --- | --- | --- | --- | --- |
| S0 | 0 | 26 | 31 | 30 | 31 | 30 | 30 | 27 | 32 | 26 | 263 |
| S1 | 31 | 30 | 32 | 32 | 28 | 31 | 30 | 29 | 31 | 29 | 303 |
| S2 | 30 | 29 | 32 | 32 | 31 | 29 | 30 | 31 | 31 | 31 | 306 |
| S3 | 20 | 30 | 29 | 28 | 26 | 31 | 31 | 31 | 31 | 30 | 287 |
| S4 | 30 | 30 | 31 | 29 | 32 | 32 | 31 | 29 | 29 | 32 | 305 |
| SUM | 111 | 145 | 155 | 151 | 148 | 153 | 152 | 147 | 154 | 148 | 1464 |
