# Supplementary material
Source: HighWire-hosted journal article supplement (https://ard.bmj.com/content/78/1/100)
Supplement: inline-supplementary-material-6 [file inline-supplementary-material-6.docx]

Table S5. Differentially expressed genes (DEGs) between EC and RegC.

| EC marker | | | | RegC marker | | | |
| --- | --- | --- | --- | --- | --- | --- | --- |
| Gene | ave_diff | power | myAUC | Gene | ave_diff | power | myAUC |
| *C2orf82* | 1.976 | 0.85 | 0.925 | *CHI3L2* | 3.993 | 0.792 | 0.104 |
| *FGFBP2* | 1.556 | 0.762 | 0.881 | *CRTAC1* | 2.907 | 0.72 | 0.14 |
| *SERPINA5* | 1.655 | 0.758 | 0.879 | *CHI3L1* | 3.542 | 0.718 | 0.141 |
| *FRZB* | 1.496 | 0.742 | 0.871 | *NEAT1* | 2.115 | 0.714 | 0.143 |
| *SCRG1* | 1.049 | 0.714 | 0.857 | *CLU* | 1.579 | 0.69 | 0.155 |
| *CHAD* | 1.284 | 0.652 | 0.826 | *HMOX1* | 2.854 | 0.66 | 0.17 |
| *CYTL1* | 1.974 | 0.644 | 0.822 | *EFEMP1* | 2.004 | 0.64 | 0.18 |
| *C2orf40* | 1.233 | 0.638 | 0.819 | *H2AFZ* | 1.225 | 0.614 | 0.193 |
| *HAPLN1* | 1.318 | 0.636 | 0.818 | *SOD2* | 2.241 | 0.566 | 0.217 |
| *SPINT2* | 1.005 | 0.63 | 0.815 | *CKS2* | 1.615 | 0.548 | 0.226 |
| *ZNF365* | 2.334 | 0.626 | 0.813 | *COL12A1* | 1.868 | 0.534 | 0.233 |
| *TSPAN2* | 1.466 | 0.618 | 0.809 | *LTBP2* | 2.142 | 0.526 | 0.237 |
| *SRSF7* | 1.372 | 0.608 | 0.804 | *AEBP1* | 1.751 | 0.51 | 0.245 |
| *LDLRAD4* | 1.803 | 0.59 | 0.795 | *IFITM2* | 1.531 | 0.508 | 0.246 |
| *NGFRAP1* | 1.055 | 0.586 | 0.793 | *SLC38A2* | 1.185 | 0.464 | 0.268 |
| *FXYD1* | 1.142 | 0.584 | 0.792 | *DNAJA1* | 1.057 | 0.462 | 0.269 |
| *WIF1* | 1.277 | 0.578 | 0.789 | *HTRA1* | 2.214 | 0.456 | 0.272 |
| *DSC2* | 2.897 | 0.572 | 0.786 | *GLRX* | 1.531 | 0.452 | 0.274 |
| *LECT1* | 1.810 | 0.558 | 0.779 | *NNMT* | 1.244 | 0.44 | 0.28 |
| *CYSTM1* | 1.319 | 0.554 | 0.777 | *OSMR* | 1.803 | 0.432 | 0.284 |
| *PDLIM4* | 1.074 | 0.548 | 0.774 | *SHISA2* | 1.780 | 0.43 | 0.285 |
| *S100A1* | 1.515 | 0.542 | 0.771 | *ASPN* | 1.081 | 0.422 | 0.289 |
| *TF* | 1.010 | 0.53 | 0.765 | *IFITM3* | 1.024 | 0.42 | 0.29 |
| *MSMO1* | 2.289 | 0.528 | 0.764 |  | | | |
| *GOT1* | 1.181 | 0.528 | 0.764 |
| *ACLY* | 1.139 | 0.52 | 0.76 |
| *TRAF3IP2* | 1.036 | 0.52 | 0.76 |
| *SLC29A1* | 1.047 | 0.516 | 0.758 |
| *STK38L* | 1.250 | 0.512 | 0.756 |
| *NFATC2* | 1.105 | 0.492 | 0.746 |
| *GIPR* | 2.128 | 0.484 | 0.742 |
| *UGP2* | 1.386 | 0.482 | 0.741 |
| *P3H2* | 1.236 | 0.482 | 0.741 |
| *LDLR* | 1.184 | 0.472 | 0.736 |
| *NEBL* | 1.224 | 0.468 | 0.734 |
| *FGF1* | 1.846 | 0.464 | 0.732 |
| *CHRDL2* | 2.646 | 0.46 | 0.73 |
| *TBCB* | 1.028 | 0.454 | 0.727 |
| *SCD* | 1.319 | 0.436 | 0.718 |
| *BHLHE40* | 1.284 | 0.428 | 0.714 |
| *CRYAB* | 1.551 | 0.426 | 0.713 |
| *CLCF1* | 1.049 | 0.424 | 0.712 |
| *CDH19* | 1.267 | 0.42 | 0.71 |
| *RGS3* | 1.181 | 0.414 | 0.707 |
| *SERPINA6* | 2.400 | 0.412 | 0.706 |
| *RAMP1* | 1.733 | 0.408 | 0.704 |
| *ITPKC* | 1.153 | 0.406 | 0.703 |
| *S100A3* | 3.559 | 0.402 | 0.701 |
